# Supplementary material for: Investigation of para-sulfonatocalix[n]arenes [n = 6, 8] as potential chelates for230U
Source: Royal Society of Chemistry journal article supplement (doi:10.1039/b918426k), 2009-12-02
Supplement: b918426k.pdf [file b918426k.pdf]

# Electronic Supplementary Information

Investigation of *para*-sulfonatocalix[n]arenes [n = 6, 8] as  
potential chelates for  $^{230}\text{U}$

Gilles Montavon, Urska Repinc, Christos Apostolidis, Frank  
Bruchertseifer, Kamel Abbas, Alfred Morgenstern

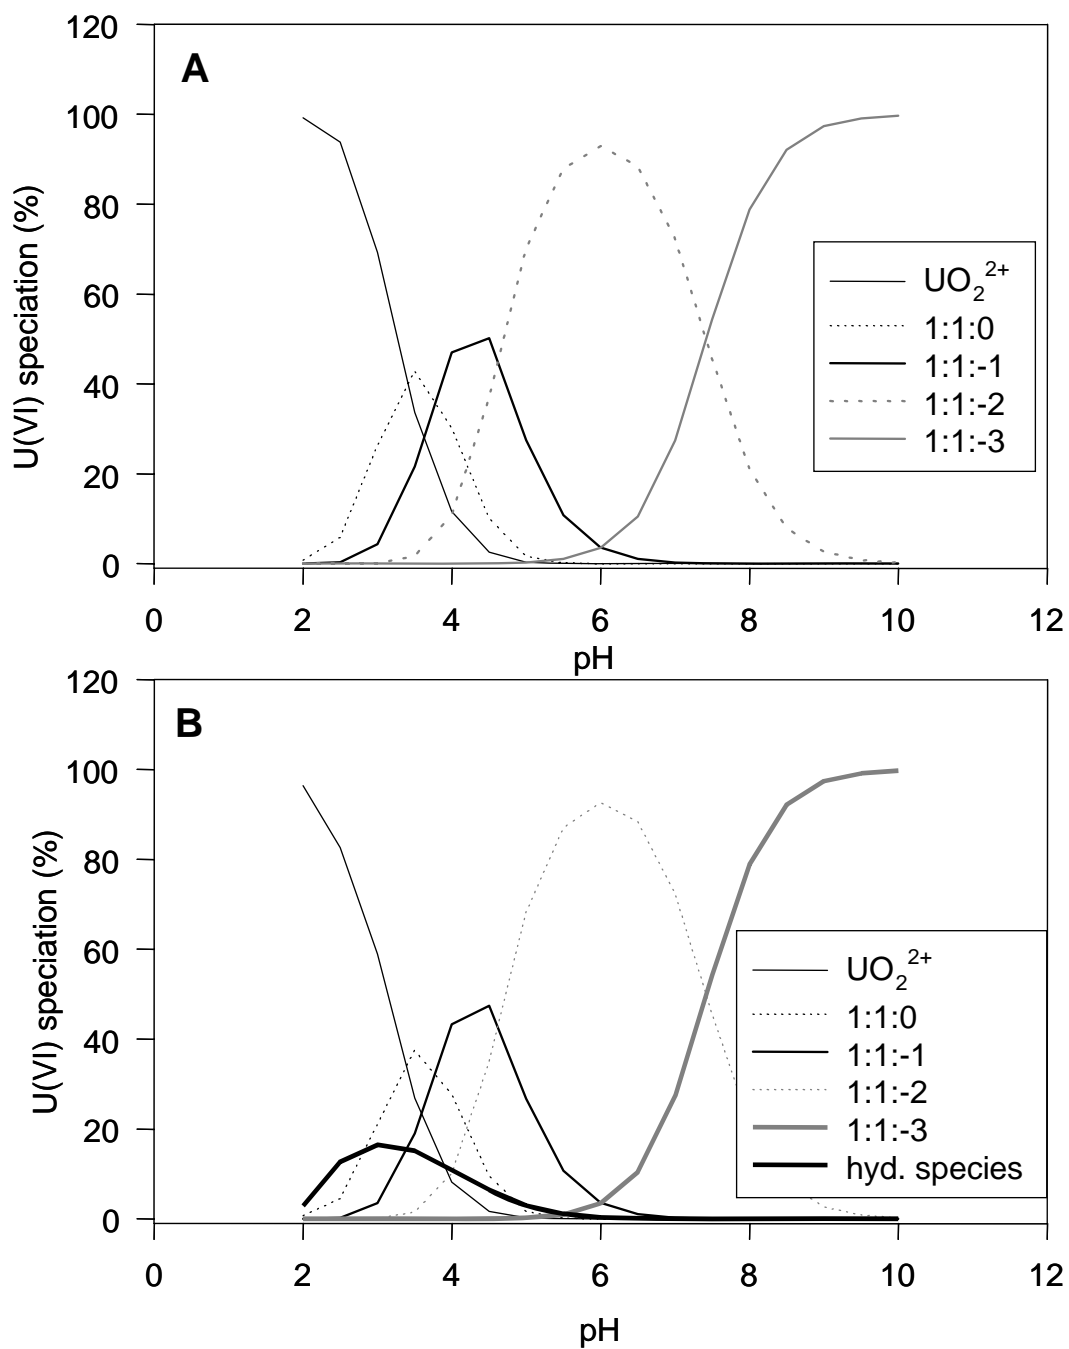

**Figure SM-1:** Complexation of U(VI) by L6. Speciation diagram as a function of pH according to the work of Sonoda *et al.*<sup>11</sup>, considering (B) or not considering (A) the formation of hydrolysed species (hyd. Species; notably  $(\text{UO}_2)_2\text{OH}^{3+}$  and  $(\text{UO}_2)_2(\text{OH})_2^{2+}$ ).

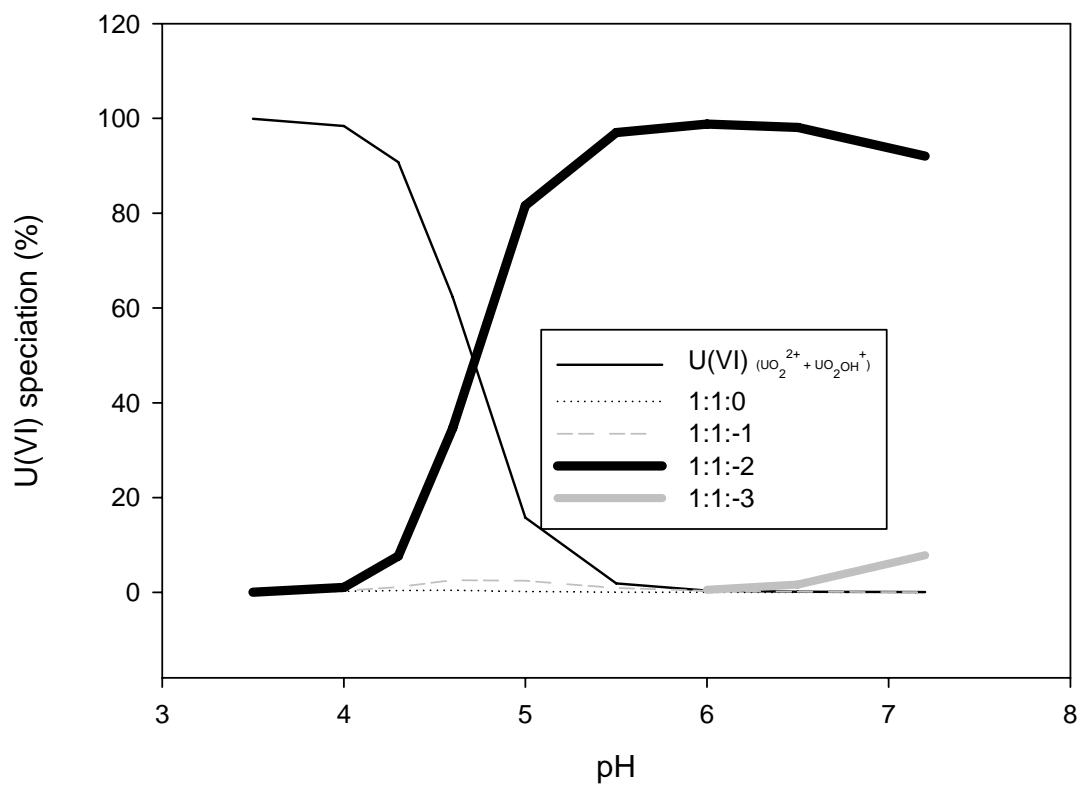

**Figure SM-2:** Complexation of U(VI) by L6. Speciation diagram calculated with the parameters determined in this work (Table 1) as a function of the pH in the conditions of Figure 5C, i.e.  $[NaClO_4]=0.1$  M,  $[U(VI)]_{tot}=1.5 \times 10^{-6}$  M and  $[L6]=10^{-5}$  M.
